# Supplementary material for: Reply to the ‘Comment on “Dynamics and rheology of vesicles under confined Poiseuille flow”’ by G. Coupier and T. Podgorski, Soft Matter, 2024, 20, DOI: 10.1039/D3SM01679J
Source: Royal Society of Chemistry journal article supplement (doi:10.1039/d4sm00367e), 2024-01-01
Supplement: d4sm00367e1.pdf [file d4sm00367e1.pdf]

## Supplementary materials

This document provides the data of simulation of the effective viscosity.

Table 1 Simulation data in Fig. 1

| $\phi$ | $\mu_{eff}/\mu_{out}(\lambda = 1)$ | $\mu_{eff}/\mu_{out}(\lambda = 5)$ | $\mu_{eff}/\mu_{out}(\lambda = 20)$ |
|--------|------------------------------------|------------------------------------|-------------------------------------|
| 0.016  | 1.005                              | 1.004                              | 1.005                               |
| 0.040  | 1.012                              | 1.009                              | 1.033                               |
| 0.064  | 1.019                              | 1.015                              | 1.022                               |
| 0.128  | 1.018                              | 1.027                              | 1.066                               |
| 0.192  | 1.063                              | 1.069                              | 1.116                               |
| 0.256  | 1.098                              | 1.131                              | 1.184                               |
| 0.321  | 1.153                              | 1.192                              | 1.277                               |
| 0.385  | 1.230                              | 1.277                              | 1.363                               |
| 0.449  | 1.339                              | 1.399                              | 1.507                               |
